# Supplementary material for: Effects of resistance training with controlled versus self-selected repetition duration on muscle mass and strength in untrained men
Source: PeerJ. 2020 Mar 6;8:e8697. doi: 10.7717/peerj.8697 (PMC7061915; doi:10.7717/peerj.8697)
Supplement: Supplemental Information 1 [file peerj-08-8697-s001.xlsx]

## Sheet: Data
				CON: controlled repetition duration
				SELF-EV: self-selected repetition duration withvolume load equalized
				SELF: self-selected repetition duration without volume load equalized
				CSA: Muscle cross-sectional area
				1-RM: Maximal dynamic strength test
				Subjects	Group	CSA (cm²)		1-RM (Kg)			Subjects	Group	Eight-week accumulated		Subjects	Group	Time under tension		Subjects	Group	Number of repetitions per session
						Pre	Post	Pre	Post				volume load (kg)				(seconds)				(Mean per subject )
				1	CON	10.087	10.518	45	60		1	CON	28111		1	CON	4		1	CON	27.5
				2	CON	10.315	10.932	78	92		2	CON	17456		2	CON	4		2	CON	26
				3	CON	14.492	14.821	60	69		3	CON	21027		3	CON	4		3	CON	25.1875
				4	CON	9.882	10.939	68	60		4	CON	15841		4	CON	4		4	CON	20.625
				5	CON	9.846	10.211	86	97		5	CON	19307		5	CON	4		5	CON	16.25
				6	CON	9.895	10.225	61	67		6	CON	13164		6	CON	4		6	CON	22.9375
				7	CON	12.775	13.017	80	75		7	CON	30396		7	CON	4		7	CON	25.25
				8	CON	10.854	12.613	70	79		8	CON	33514		8	CON	4		8	CON	22.75
				9	CON	15.134	16.476	106	132		9	CON	21142		9	CON	4		9	CON	26.875
				10	CON	10.723	12.247	67	76		10	CON	12939		10	CON	4		10	CON	28.9375
				11	CON	8.53	9.962	52	58		11	CON	24528		11	CON	4		11	CON	30.625
				12	CON	9.816	11.938	68	78		12	CON	13886		12	CON	4		12	CON	21.3125
				13	CON	18.234	18.501	106	118		13	CON	26385		13	CON	4		13	CON	31.4375
				14	CON	11.367	12.407	71	80		14	CON	21730		14	CON	4		14	CON	25.5625
				15	CON	19.435	20.855	86	102		15	CON	17876		15	CON	4		15	CON	25
				16	CON	11.122	11.335	46	64		16	CON	24931		16	CON	4		16	CON	19.5625
				17	CON	11.632	12.458	96	104		17	CON	14560		17	CON	4		17	CON	21.4375
				18	CON	9.931	10.607	80	82		18	CON	16162		18	CON	4		18	CON	22.3125
				19	CON	17.368	19.377	88	92		19	CON	19392		19	CON	4		19	CON	25
				20	CON	10.439	11.174	61	68		20	CON	15676		20	CON	4		20	CON	18.625
				1	SELF-EV	9.97	11.474	74	86		1	SELF-EV	24528		1	SELF-EV	1.65		1	SELF-EV	28.1875
				2	SELF-EV	11.558	11.769	72	79		2	SELF-EV	13886		2	SELF-EV	1.6		2	SELF-EV	27.625
				3	SELF-EV	10.852	12.401	80	83		3	SELF-EV	26385		3	SELF-EV	2.09		3	SELF-EV	24.375
				4	SELF-EV	12.392	13.473	70	77		4	SELF-EV	21730		4	SELF-EV	1.57		4	SELF-EV	20.625
				5	SELF-EV	12.528	14.145	71	81		5	SELF-EV	17876		5	SELF-EV	1.64		5	SELF-EV	17.1875
				6	SELF-EV	10.2	11.4	48	53		6	SELF-EV	24931		6	SELF-EV	1.57		6	SELF-EV	25.75
				7	SELF-EV	11.029	12.693	106	118		7	SELF-EV	14560		7	SELF-EV	1.12		7	SELF-EV	26.4375
				8	SELF-EV	18.143	19.459	102	112		8	SELF-EV	16162		8	SELF-EV	1.75		8	SELF-EV	21.25
				9	SELF-EV	11.316	12.663	79	89		9	SELF-EV	19392		9	SELF-EV	2.32		9	SELF-EV	27.125
				10	SELF-EV	11.376	12.519	57	62		10	SELF-EV	15676		10	SELF-EV	1.55		10	SELF-EV	28.5625
				1	SELF	8.372	8.216	47	63		1	SELF	39433		1	SELF	1.94		1	SELF	43.75
				2	SELF	15.4	17.026	70	73		2	SELF	28416		2	SELF	2.47		2	SELF	39.3125
				3	SELF	9.219	10.514	72	80		3	SELF	29295		3	SELF	1.28		3	SELF	46.1875
				4	SELF	11.259	13.198	78	79		4	SELF	25159		4	SELF	1.6		4	SELF	39.8125
				5	SELF	14.847	17.036	104	130		5	SELF	24074		5	SELF	2.03		5	SELF	34.375
				6	SELF	7.759	9.661	63	77		6	SELF	15984		6	SELF	2.03		6	SELF	31.8125
				7	SELF	14.5	15.672	74	82		7	SELF	47638		7	SELF	1.74		7	SELF	32.4375
				8	SELF	9.987	10.428	88	103		8	SELF	50651		8	SELF	1.37		8	SELF	28.5625
				9	SELF	18.807	20.64	50	63		9	SELF	35495		9	SELF	1.58		9	SELF	29.8125
				10	SELF	9.028	9.632	80	82		10	SELF	18112		10	SELF	2.21		10	SELF	27.3125
